# Supplementary material for: Luminescent ternary inorganic-organic mesoporous hybrids Eu(TTASi-SBA-15)phen: covalent linkage in TTA directly functionalized SBA-15
Source: Royal Society of Chemistry journal article supplement (doi:10.1039/b914586a), 2009-09-29

**Fig. S1** IR spectra for TTA (solid line), TTASi (dash line) and functionalized hybrid mesoporous material TTASi-SBA-15 (dot line)

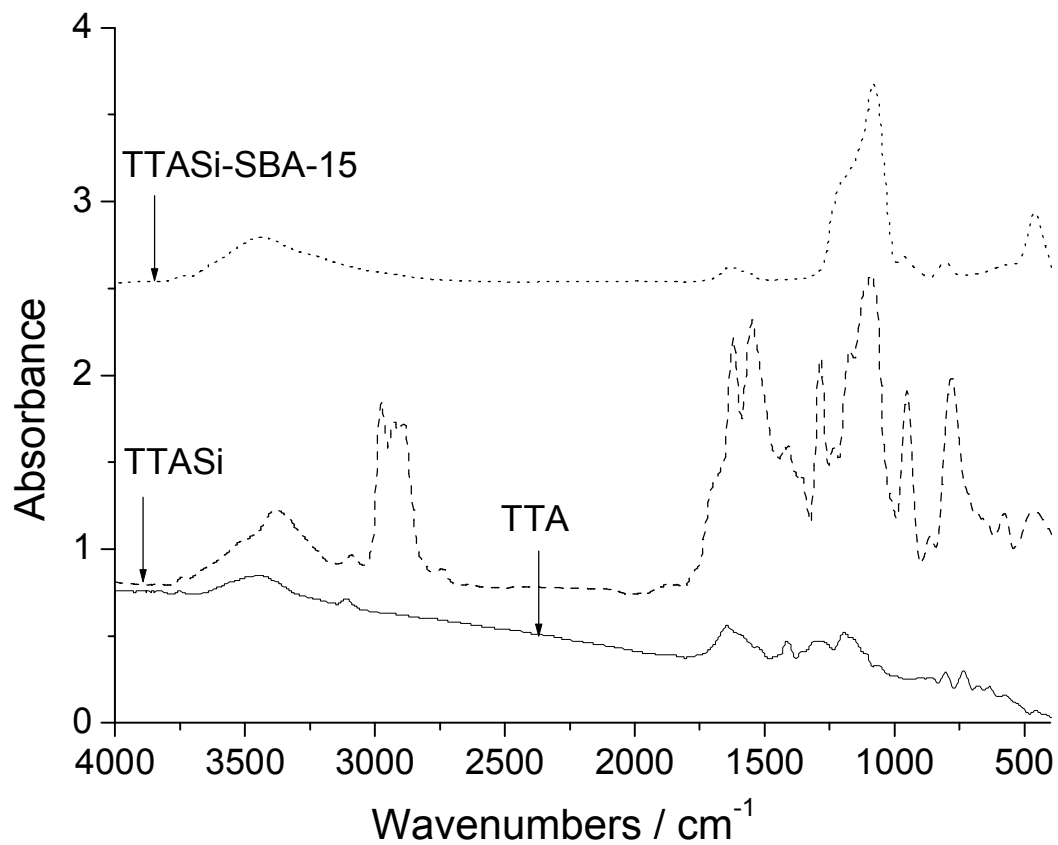

Fig. S2 UV absorption spectra for TTA (solid line), TTASi (dash line) and TTASi-SBA-15 (dot line)

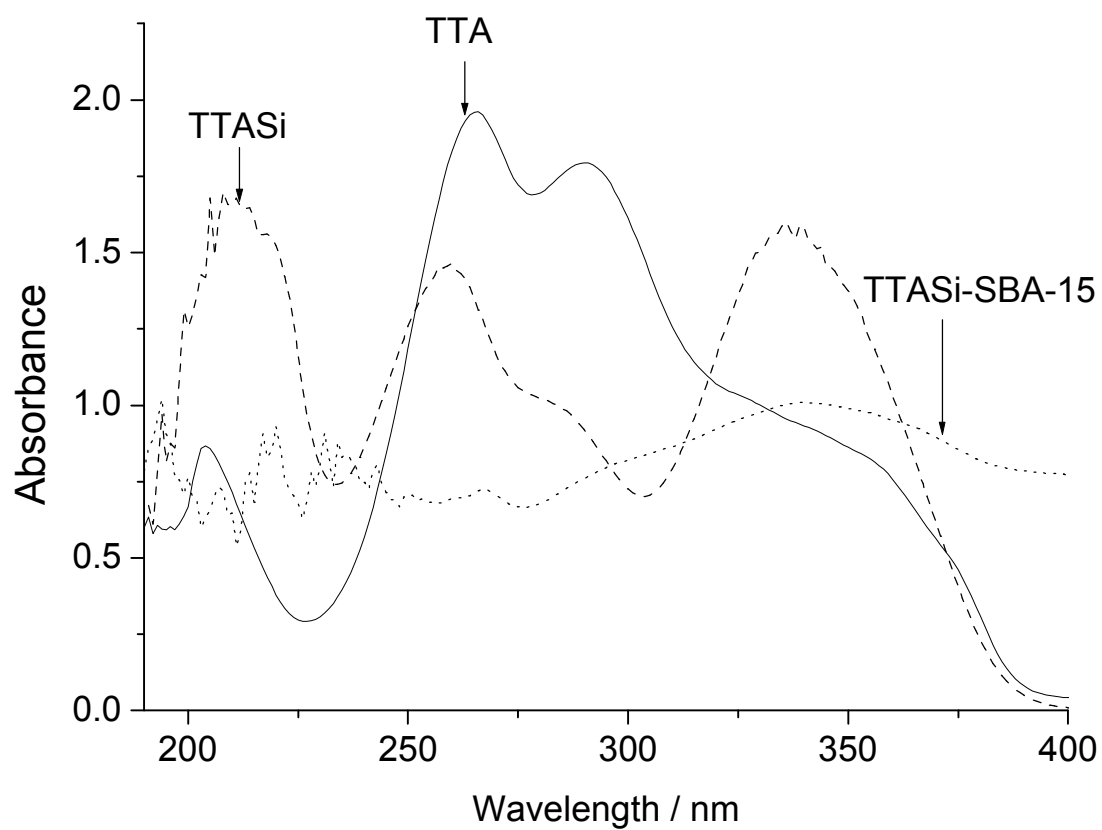

Fig. S3 The TGA curves of  $\text{Eu}(\text{TfABr-SBA-15})_3\text{phen}$  (a) and the pure complex  $\text{Eu}(\text{TTA})_3\text{phen}$  (b)

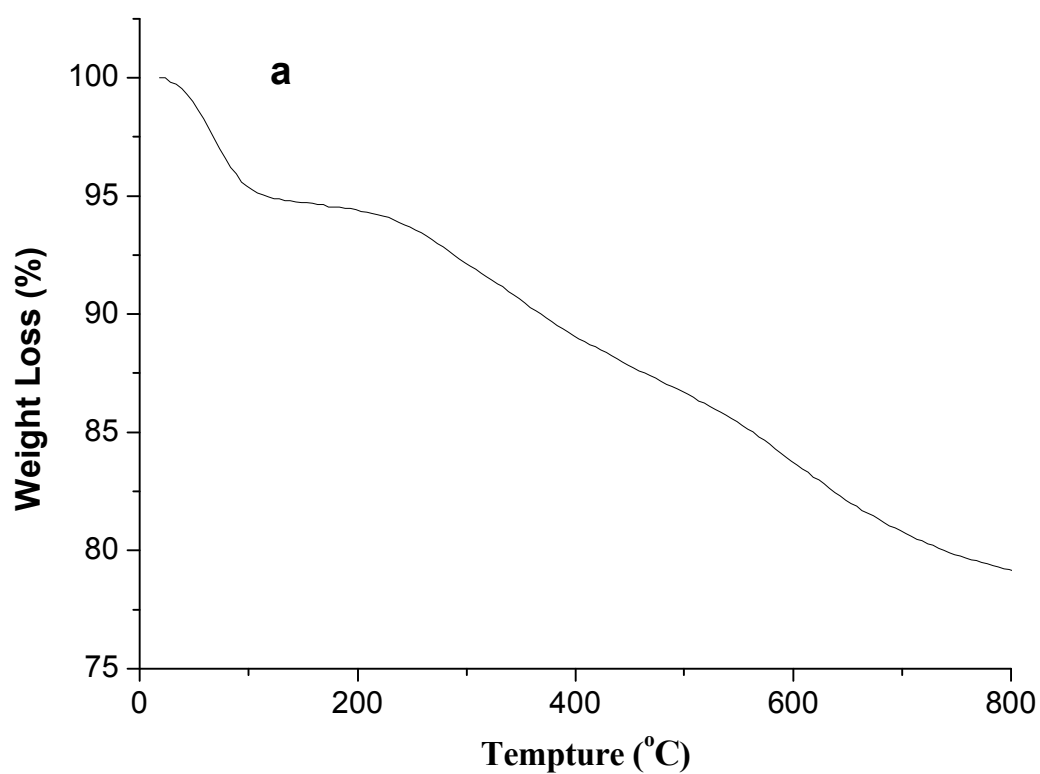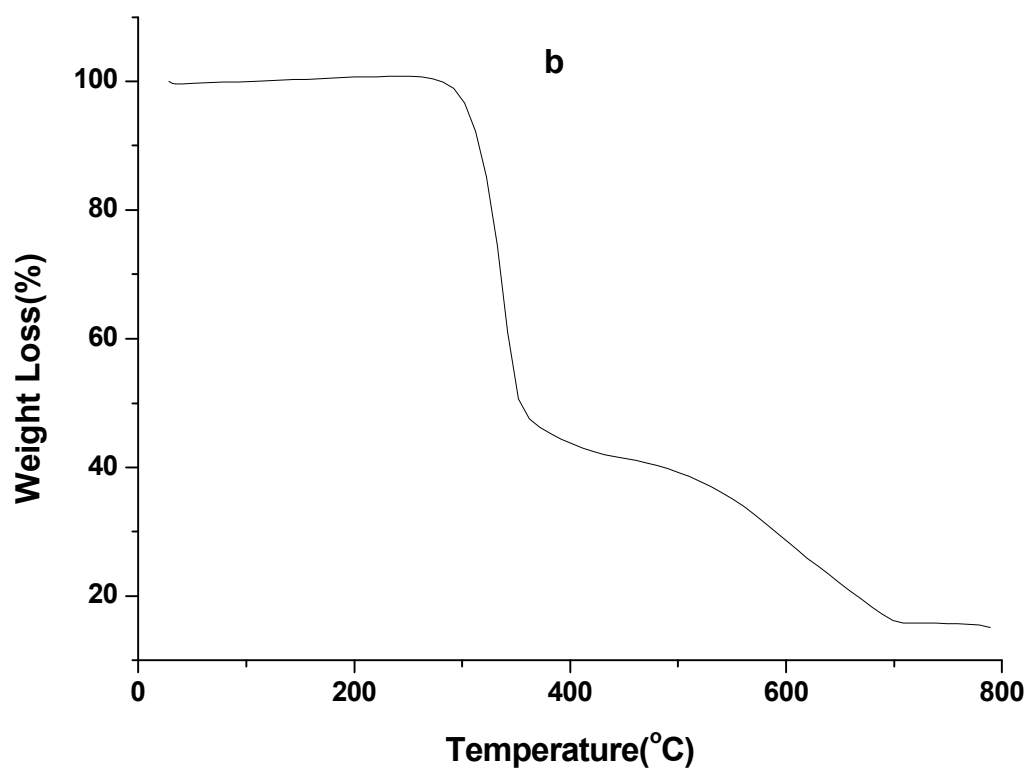

Fig. S4 Phosphorescence spectra of TTA (solid line) and TTASi (dashed line)

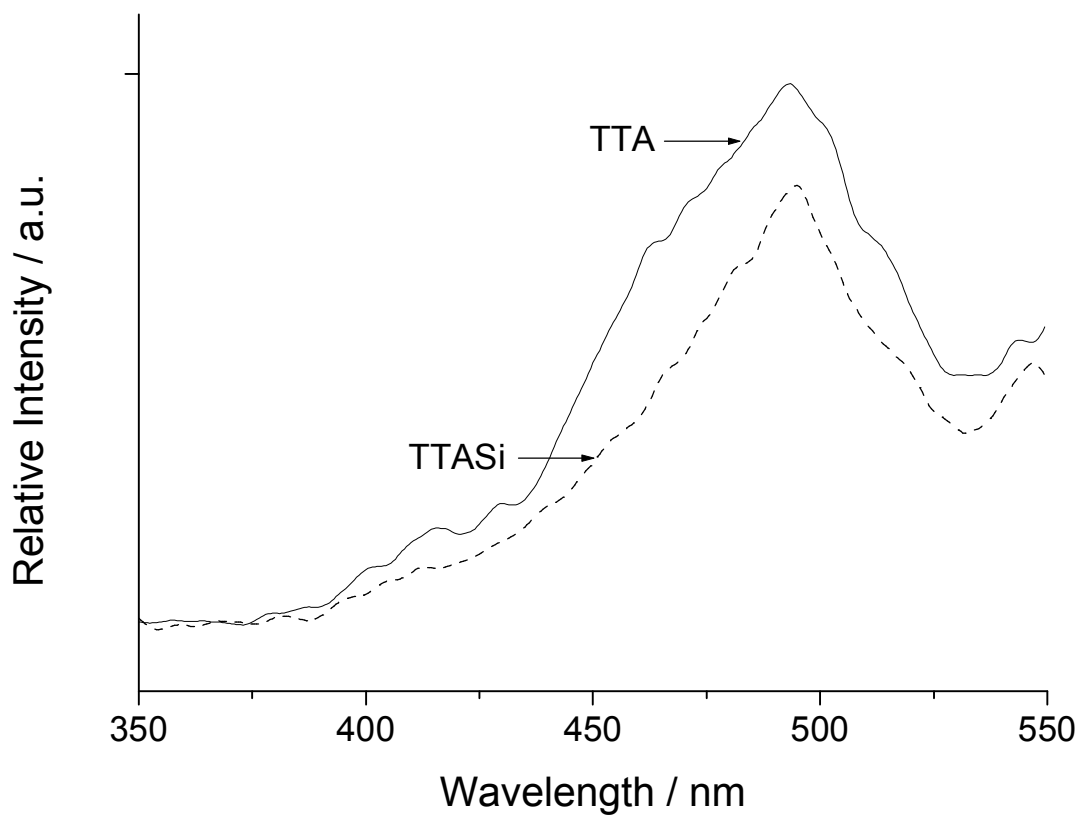

Electronic Supplementary Information for Dalton Transactions  
This journal is © The Royal Society of Chemistry 2009

**Fig. S5** The fluorescence decay curves of  $\text{Eu}(\text{TTASi-SBA-15})_3\text{phen}$  and  $\text{Eu}(\text{TTASi-SBA-15})_3$

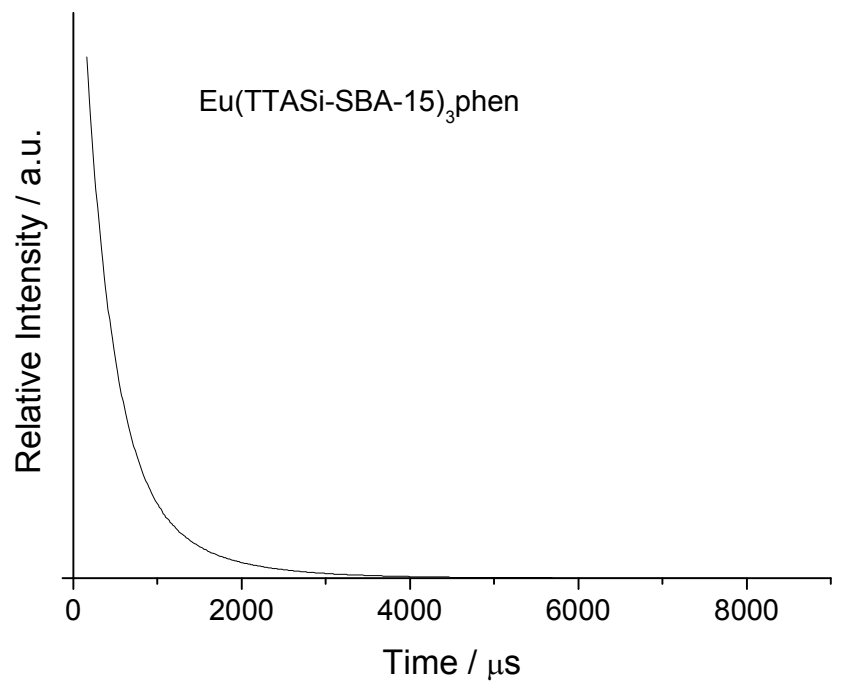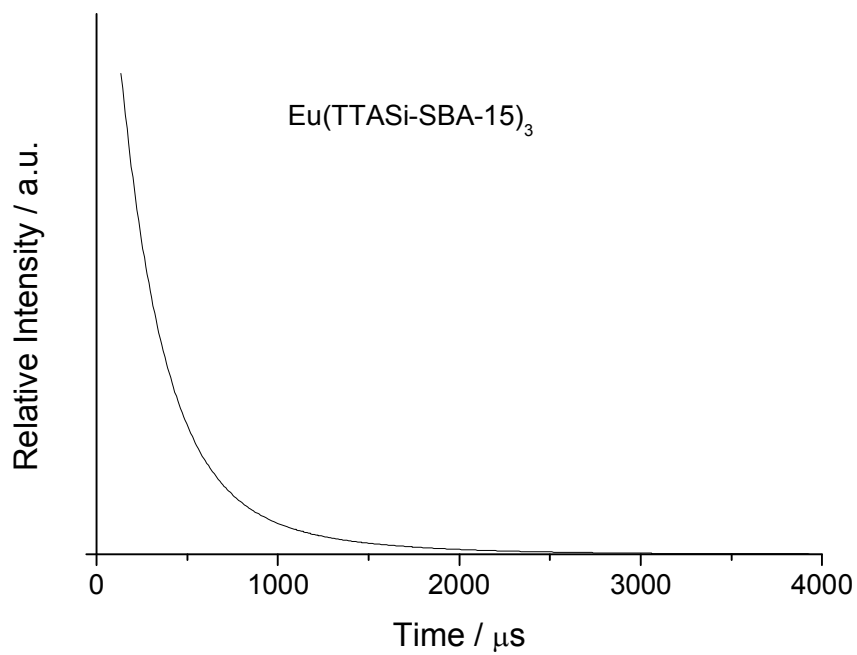

Supplement: b914586a.pdf [file b914586a.pdf]
